# Supplementary material for: Simulating Metabolic Pathways to Enhance Interpretations of Metabolome Genome-Wide Association Studies
Source: Research Square preprint supplement (doi:10.21203/rs.3.rs-5590960/v1), 2025-03-27
Supplement: Supplementary file 1 [file 7a38f3d19570644290b846df.xlsx]

## Sheet: supplementary_table_1
Supplementary Table 1. The gene assignments for each enzyme.
	Enzyme name	Assigned Protein name	Assigned gene
SHMT	serinehydroxymethyltransferase	Serine hydroxymethyltransferase 1	SHMT1
DHFR	serinehydroxymethyltransferase	Dihydrofolate reductase	DHFR
FTD	10-formyltetrahydrofolate dehydrogenase	Aldehyde dehydrogenase 1 family member L1	ALDH1L1
FTS	10-formyltetrahydrofolate synthase	Methylenetetrahydrofolate dehydrogenase	MTHFD1
MTCH	5,10-methenyltetrahydrofolate cyclohydrolase	Methylenetetrahydrofolate dehydrogenase 2	MTHFD1
MTD	5,10-methylenetetrahydrofolate dehydrogenase	Methylenetetrahydrofolate dehydrogenase 2	MTHFD1
MTHFR	5,10-methylenetetrahydrofolate reductase	Methylenetetrahydrofolate reductase	MTHFR
AICART	aminoimidazolecarboxamide ribonucleotide transferase	5-aminoimidazole-4-carboxamide ribonucleotide formyltransferase/IMP cyclohydrolase	ATIC
PGT	Phosphoribosyl glycinamidetransformalase	Phosphoribosylglycinamide formyltransferase	GART
TS	thymidylate synthase	Thymidylate synthetase	TYMS
MAT-I	methionine adenosyl transferase I	Methionine adenosyltransferase 1A, Methionine adenosyltransferase 2A, and Methionine adenosyltransferase 2 non-catalytic beta subunit	MAT1A, MAT2A, and MAT2B
MAT-III	methionine adenosyl transferase III	Methionine adenosyltransferase 1A, Methionine adenosyltransferase 2A, and Methionine adenosyltransferase 2 non-catalytic beta subunit	MAT1A, MAT2A, and MAT2B
GNMT	glycine N-methyltransferase	Glycine N-methyltransferase	GNMT
DNMT	DNA-methyltransferase	DNA methyltransferase 1	DNMT1
SAAH	S-adenosylhomocysteine hydrolase	Adenosylhomocysteinase	AHCY
MS	methionine synthase	5-methyltetrahydrofolate-homocysteine methyltransferase	MTR
BHMT	betaine-homocysteine methyltransferase	Betaine--homocysteine S-methyltransferase	BHMT
CBS	cystathionine β -synthase	Cystathionine beta-synthase	CBS
