# Supplementary material for: Simulating Metabolic Pathways to Enhance Interpretations of Metabolome Genome-Wide Association Studies
Source: Research Square preprint supplement (doi:10.21203/rs.3.rs-5590960/v1), 2025-03-27
Supplement: Supplementary file 2 [file 9ed5adefa75b2da5b6a48ffd.docx]

# Supplementary Materials

for

Simulating Metabolic Pathways to Enhance Interpretations of Metabolome Genome-Wide Association Studies

Shun Kodate1,2,†, Mitsuharu Sato1,†, Eiji Hishinuma1,3, Kaname Kojima1, Ikuko N Motoike1,4, ToMMo Study Group, Seizo Koshiba1,3, Masayuki Yamamoto1,3, Kazunori D Yamada2,4, and Kengo Kinoshita1,3,4,*

1 Tohoku Medical Megabank Organization, Tohoku University, Sendai, Miyagi 980-8573, Japan

2 Unprecedented-scale Data Analytics Center, Tohoku University, Sendai, Miyagi 980-0845, Japan

3 Advanced Research Center for Innovations in Next-Generation Medicine, Tohoku University, Sendai, Miyagi 980-8573, Japan

4 Graduate School of Information Sciences, Tohoku University, Sendai, Miyagi 980-8579, Japan

† co-first author

* Correspondence should be addressed to Kengo Kinoshita,

Tohoku Medical Megabank Organization, Tohoku University, 2-1, Seiryo-machi, Aoba-ku, Sendai, Miyagi 980-8573, Japan

E-mail: [kengo@tohoku.ac.jp](mailto:kengo@tohoku.ac.jp)

The following tables display the changes of metabolite concentration for each enzyme when the reaction rate is decreased by 50% in our simulations, alongside corresponding results from MGWAS. For the MGWAS data, we have included the variant with the Reference SNP (rs) number with the smallest -value for each enzyme. Rows are sorted by the -value in ascending order. Values for enzymes not included in MGWAS are omitted.

Changes of metabolite concentrations by altered AICART (MGWAS: rs549721282_*, gene: ATIC).

| **Metabolite** | **Change of  concentrations (%)** | **MGWAS** | **MGWAS *p*** |
| --- | --- | --- | --- |
| Sarcosine | 0 | -5.24 × 10-2 | 1.69 × 10-3 |
| Formate | 0 | -4.58 × 10-3 | 2.00 × 10-1 |
| Glycine | 0 | -3.84 × 10-3 | 2.70 × 10-1 |
| Methionine | 0 | -2.40 × 10-3 | 3.10 × 10-1 |
| Serine | 0 | +1.69 × 10-3 | 3.90 × 10-1 |
| Homocysteine | 0 | -2.88 × 10-3 | 7.77 × 10-1 |
| N, N-dimethylglycine | 0 | +1.02 × 10-3 | 9.10 × 10-1 |

Changes of metabolite concentrations by altered BHMT (MGWAS: rs686764_T, gene: BHMT).

| **Metabolite** | **Change of  concentrations (%)** | **MGWAS** | **MGWAS *p*** |
| --- | --- | --- | --- |
| N, N-dimethylglycine | −4.53 × 101 | -3.06 × 10-2 | 5.30 × 10-94 |
| Serine | −1.33 × 100 | -1.07 × 10-3 | 9.10 × 10-2 |
| Glycine | +3.97 × 10−1 | -6.64 × 10-4 | 2.80 × 10-1 |
| Formate | +1.93 × 100 | -5.60 × 10-4 | 5.10 × 10-1 |
| Homocysteine | +1.11 × 101 | -1.12 × 10-3 | 6.86 × 10-1 |
| Sarcosine | −2.93 × 101 | +1.60 × 10-3 | 7.26 × 10-1 |
| Methionine | −1.29 × 101 | +1.36 × 10-5 | 9.90 × 10-1 |

Changes of metabolite concentrations by altered CBS (MGWAS: rs1788466_A, gene: CBS).

| **Metabolite** | **Change of  concentrations (%)** | **MGWAS** | **MGWAS *p*** |
| --- | --- | --- | --- |
| Homocysteine | +6.79 × 101 | +1.35 × 10-2 | 7.76 × 10-5 |
| Glycine | +1.34 × 10−1 | -1.60 × 10-3 | 5.60 × 10-2 |
| Serine | +3.57 × 10−2 | -1.55 × 10-3 | 6.30 × 10-2 |
| Methionine | +1.09 × 101 | -1.34 × 10-3 | 7.40 × 10-2 |
| Sarcosine | +3.82 × 101 | +3.62 × 10-3 | 5.22 × 10-1 |
| Formate | −1.18 × 101 | -7.52 × 10-4 | 7.90 × 10-1 |
| N, N-dimethylglycine | +4.72 × 101 | +6.39 × 10-4 | 8.00 × 10-1 |

Changes of metabolite concentrations by altered DHFR (MGWAS: rs59832549_TACACAC, gene: DHFR).

| **Metabolite** | **Change of  concentrations (%)** | **MGWAS** | **MGWAS *p*** |
| --- | --- | --- | --- |
| N, N-dimethylglycine | +6.31 × 10−2 | -8.49 × 10-3 | 3.90 × 10-3 |
| Serine | +3.26 × 10−2 | -8.83 × 10-4 | 3.60 × 10-1 |
| Glycine | −3.13 × 10−2 | -3.40 × 10-4 | 3.90 × 10-1 |
| Sarcosine | +7.35 × 10−2 | -6.74 × 10-3 | 4.82 × 10-1 |
| Formate | +3.29 × 10−2 | -1.75 × 10-3 | 5.50 × 10-1 |
| Methionine | −1.17 × 10−2 | +5.95 × 10-4 | 6.30 × 10-1 |
| Homocysteine | +3.02 × 10−2 | +1.28 × 10-4 | 9.83 × 10-1 |

Changes of metabolite concentrations by altered DNMT (MGWAS: rs79495599 _A, gene: DNMT1).

| **Metabolite** | **Change of  concentrations (%)** | **MGWAS** | **MGWAS *p*** |
| --- | --- | --- | --- |
| Methionine | −1.26 × 101 | +5.56 × 10-3 | 1.80 × 10-4 |
| N, N-dimethylglycine | −8.43 × 100 | +9.55 × 10-3 | 5.50 × 10-3 |
| Sarcosine | +3.35 × 101 | +1.59 × 10-2 | 1.61 × 10-1 |
| Formate | −1.16 × 101 | +3.94 × 10-3 | 2.10 × 10-1 |
| Serine | −1.82 × 100 | +1.42 × 10-3 | 2.10 × 10-1 |
| Glycine | −2.06 × 100 | -7.44 × 10-4 | 6.30 × 10-1 |
| Homocysteine | −2.40 × 100 | -1.64 × 10-3 | 8.09 × 10-1 |

Changes of metabolite concentrations by altered FTS (MGWAS: rs1256145_C, gene: MTHFD1).

| **Metabolite** | **Change of  concentrations (%)** | **MGWAS** | **MGWAS *p*** |
| --- | --- | --- | --- |
| Formate | +1.32 × 102 | -4.62 × 10-3 | 1.70 × 10-4 |
| Glycine | +1.19 × 100 | +1.10 × 10-3 | 1.70 × 10-1 |
| Sarcosine | +4.39 × 100 | -6.14 × 10-3 | 1.94 × 10-1 |
| Methionine | -1.18 × 10-1 | -5.28 × 10-4 | 4.40 × 10-1 |
| Homocysteine | +2.71 × 10-1 | -2.11 × 10-3 | 4.60 × 10-1 |
| N, N-dimethylglycine | +4.15 × 100 | -1.01 × 10-3 | 4.90 × 10-1 |
| Serine | +4.82 × 10-1 | -1.84 × 10-4 | 6.50 × 10-1 |

Changes of metabolite concentrations by altered GNMT (MGWAS: rs9471978_C, gene: GNMT).

| **Metabolite** | **Change of  concentrations (%)** | **MGWAS** | **MGWAS *p*** |
| --- | --- | --- | --- |
| Sarcosine | -1.81 × 101 | -2.52 × 10-2 | 3.11 × 10-6 |
| Glycine | +1.95 × 100 | -2.32 × 10-3 | 2.40 × 10-2 |
| Methionine | -8.92 × 100 | -1.38 × 10-3 | 5.60 × 10-2 |
| Formate | -1.06 × 101 | +2.48 × 10-3 | 8.80 × 10-2 |
| Serine | -1.43 × 100 | -5.43 × 10-4 | 4.90 × 10-1 |
| N, N-dimethylglycine | -6.69 × 100 | +6.05 × 10-4 | 7.40 × 10-1 |
| Homocysteine | -2.07 × 100 | +4.07 × 10-4 | 9.02 × 10-1 |

Changes of metabolite concentrations by altered MAT-I　(MGWAS: rs150325987_*, gene: MAT2B).

| **Metabolite** | **Change of  concentrations (%)** | **MGWAS** | **MGWAS *p*** |
| --- | --- | --- | --- |
| N, N-dimethylglycine | −1.24 × 101 | -8.88 × 10-3 | 5.10 × 10-4 |
| Methionine | +5.47 × 101 | -2.03 × 10-3 | 4.10 × 10-2 |
| Homocysteine | −1.79 × 101 | -4.32 × 10-3 | 3.36 × 10-1 |
| Serine | +3.78 × 100 | -4.32 × 10-5 | 7.70 × 10-1 |
| Glycine | +9.63 × 10−2 | +5.64 × 10-4 | 7.80 × 10-1 |
| Sarcosine | −2.27 × 101 | +1.26 × 10-3 | 8.66 × 10-1 |
| Formate | +2.83 × 101 | -2.03 × 10-4 | 9.00 × 10-1 |

Changes of metabolite concentrations by altered MAT-III (MGWAS: rs150325987_*, gene: MAT2B).

| **Metabolite** | **Change of  concentrations (%)** | **MGWAS** | **MGWAS *p*** |
| --- | --- | --- | --- |
| N, N-dimethylglycine | -6.13 × 100 | -8.88 × 10-3 | 5.10 × 10-4 |
| Methionine | +2.59 × 101 | -2.03 × 10-3 | 4.10 × 10-2 |
| Homocysteine | -8.96 × 100 | -4.32 × 10-3 | 3.36 × 10-1 |
| Serine | +1.69 × 100 | -4.32 × 10-5 | 7.70 × 10-1 |
| Glycine | +1.30 × 10-1 | +5.64 × 10-4 | 7.80 × 10-1 |
| Sarcosine | -1.13 × 101 | +1.26 × 10-3 | 8.66 × 10-1 |
| Formate | +9.62 × 100 | -2.03 × 10-4 | 9.00 × 10-1 |

Changes of metabolite concentrations by altered MS (MGWAS: rs12037527_C, gene: MTR).

| **Metabolite** | **Change of  concentrations (%)** | **MGWAS** | **MGWAS *p*** |
| --- | --- | --- | --- |
| Homocysteine | -3.90 × 10-1 | +1.11 × 10-2 | 2.61 × 10-3 |
| Serine | +2.45 × 100 | -1.39 × 10-3 | 1.10 × 10-1 |
| N, N-dimethylglycine | -4.37 × 10-1 | +3.32 × 10-3 | 2.50 × 10-1 |
| Methionine | -1.02 × 101 | +7.80 × 10-4 | 3.20 × 10-1 |
| Sarcosine | -1.25 × 101 | -4.48 × 10-3 | 4.68 × 10-1 |
| Formate | +4.54 × 101 | +1.35 × 10-3 | 4.70 × 10-1 |
| Glycine | -1.41 × 100 | -1.69 × 10-3 | 6.30 × 10-1 |

Changes of metabolite concentrations by altered MTD (MGWAS: rs1256145_C, gene: MTHFD1).

| **Metabolite** | **Change of  concentrations (%)** | **MGWAS** | **MGWAS *p*** |
| --- | --- | --- | --- |
| Formate | +1.09 × 10−3 | -4.62 × 10-3 | 1.70 × 10-4 |
| Glycine | +2.41 × 10−2 | +1.10 × 10-3 | 1.70 × 10-1 |
| Sarcosine | +7.36 × 10−2 | -6.14 × 10-3 | 1.94 × 10-1 |
| Methionine | −2.72 × 10−3 | -5.28 × 10-4 | 4.40 × 10-1 |
| Homocysteine | +5.83 × 10−2 | -2.11 × 10-3 | 4.60 × 10-1 |
| N, N-dimethylglycine | +6.68 × 10−2 | -1.01 × 10-3 | 4.90 × 10-1 |
| Serine | −2.37 × 10−2 | -1.84 × 10-4 | 6.50 × 10-1 |

Changes of metabolite concentrations by altered MTCH (MGWAS: rs1256145_C, gene: MTHFD1).

| **Metabolite** | **Change of  concentrations (%)** | **MGWAS** | **MGWAS *p*** |
| --- | --- | --- | --- |
| Formate | -3.11 × 10-1 | -4.62 × 10-3 | 1.70 × 10-4 |
| Glycine | +5.95 × 10-1 | +1.10 × 10-3 | 1.70 × 10-1 |
| Sarcosine | +1.70 × 100 | -6.14 × 10-3 | 1.94 × 10-1 |
| Methionine | -5.87 × 10-2 | -5.28 × 10-4 | 4.40 × 10-1 |
| Homocysteine | +1.37 × 100 | -2.11 × 10-3 | 4.60 × 10-1 |
| N, N-dimethylglycine | +1.53 × 100 | -1.01 × 10-3 | 4.90 × 10-1 |
| Serine | -5.89 × 10-1 | -1.84 × 10-4 | 6.50 × 10-1 |

Changes of metabolite concentrations by altered PGT (MGWAS: rs74838149_G, gene: GART).

| **Metabolite** | **Change of  concentrations (%)** | **MGWAS** | **MGWAS *p*** |
| --- | --- | --- | --- |
| Methionine | -5.05 × 10-1 | +3.34 × 10-3 | 1.30 × 10-2 |
| Sarcosine | -3.15 × 100 | +1.25 × 10-2 | 2.16 × 10-1 |
| Homocysteine | -4.76 × 100 | +5.10 × 10-3 | 4.00 × 10-1 |
| Formate | +3.86 × 101 | -2.46 × 10-3 | 5.40 × 10-1 |
| Serine | +5.31 × 100 | +4.64 × 10-4 | 6.80 × 10-1 |
| Glycine | -5.07 × 100 | +1.09 × 10-3 | 8.10 × 10-1 |
| N, N-dimethylglycine | -3.10 × 100 | +6.70 × 10-4 | 8.70 × 10-1 |

Changes of metabolite concentrations by altered SAAH (MGWAS: rs75334389_*, gene: AHCY).

| **Metabolite** | **Change of  concentrations (%)** | **MGWAS** | **MGWAS *p*** |
| --- | --- | --- | --- |
| Homocysteine | -2.00 × 100 | +1.88 × 10-2 | 3.13 × 10-3 |
| Methionine | -2.21 × 100 | -2.82 × 10-3 | 4.30 × 10-2 |
| N, N-dimethylglycine | -3.36 × 100 | -5.91 × 10-3 | 5.90 × 10-2 |
| Formate | -1.45 × 100 | -3.47 × 10-3 | 1.40 × 10-1 |
| Sarcosine | -2.19 × 100 | +2.43 × 10-3 | 8.15 × 10-1 |
| Serine | -2.62 × 10-1 | +1.70 × 10-4 | 9.30 × 10-1 |
| Glycine | +1.15 × 10-1 | +1.39 × 10-3 | 9.70 × 10-1 |

Changes of metabolite concentrations by altered SHMT (MGWAS: rs2688030_G, gene: SHMT1).

| **Metabolite** | **Change of  concentrations (%)** | **MGWAS** | **MGWAS *p*** |
| --- | --- | --- | --- |
| Formate | −5.34 × 10−1 | -7.38 × 10-3 | 9.00 × 10-9 |
| Glycine | −2.48 × 10−1 | +1.99 × 10-3 | 5.90 × 10-2 |
| Methionine | −5.26 × 10−2 | -5.00 × 10-4 | 3.80 × 10-1 |
| Sarcosine | +1.16 × 10−1 | -2.56 × 10-3 | 5.64 × 10-1 |
| N, N-dimethylglycine | +8.20 × 10−2 | -3.86 × 10-4 | 6.10 × 10-1 |
| Serine | +2.11 × 10−1 | +1.82 × 10-4 | 7.40 × 10-1 |
| Homocysteine | +2.42 × 10−2 | -4.93 × 10-4 | 8.54 × 10-1 |

Changes of metabolite concentrations by altered TS (MGWAS: rs150960666_T, gene: TYMS).

| **Metabolite** | **Change of  concentrations (%)** | **MGWAS** | **MGWAS *p*** |
| --- | --- | --- | --- |
| Formate | +7.90 × 100 | -1.00 × 10-2 | 3.50 × 10-3 |
| Methionine | -1.11 × 10-1 | -1.60 × 10-3 | 3.20 × 10-1 |
| N, N-dimethylglycine | -2.22 × 100 | -3.50 × 10-3 | 4.20 × 10-1 |
| Homocysteine | -2.47 × 100 | +5.83 × 10-3 | 4.84 × 10-1 |
| Serine | +2.00 × 100 | -1.22 × 10-3 | 5.10 × 10-1 |
| Sarcosine | -2.34 × 100 | +8.61 × 10-3 | 5.31 × 10-1 |
| Glycine | -1.99 × 100 | -1.85 × 10-3 | 5.90 × 10-1 |

In the systematic analysis of enzyme-metabolite relationships, we examined cases where the enzyme reaction rate was reduced from 100% to 10% (Figure 2A). Additionally, we analyzed cases where the reaction rate was increased from 100% to 200% in 10% increments (Figure S1). The overall results remained consistent: the trends of metabolites, whether their concentrations were noticeably affected or unaffected by changes in enzyme reaction rates, remained unchanged (Figure S2).


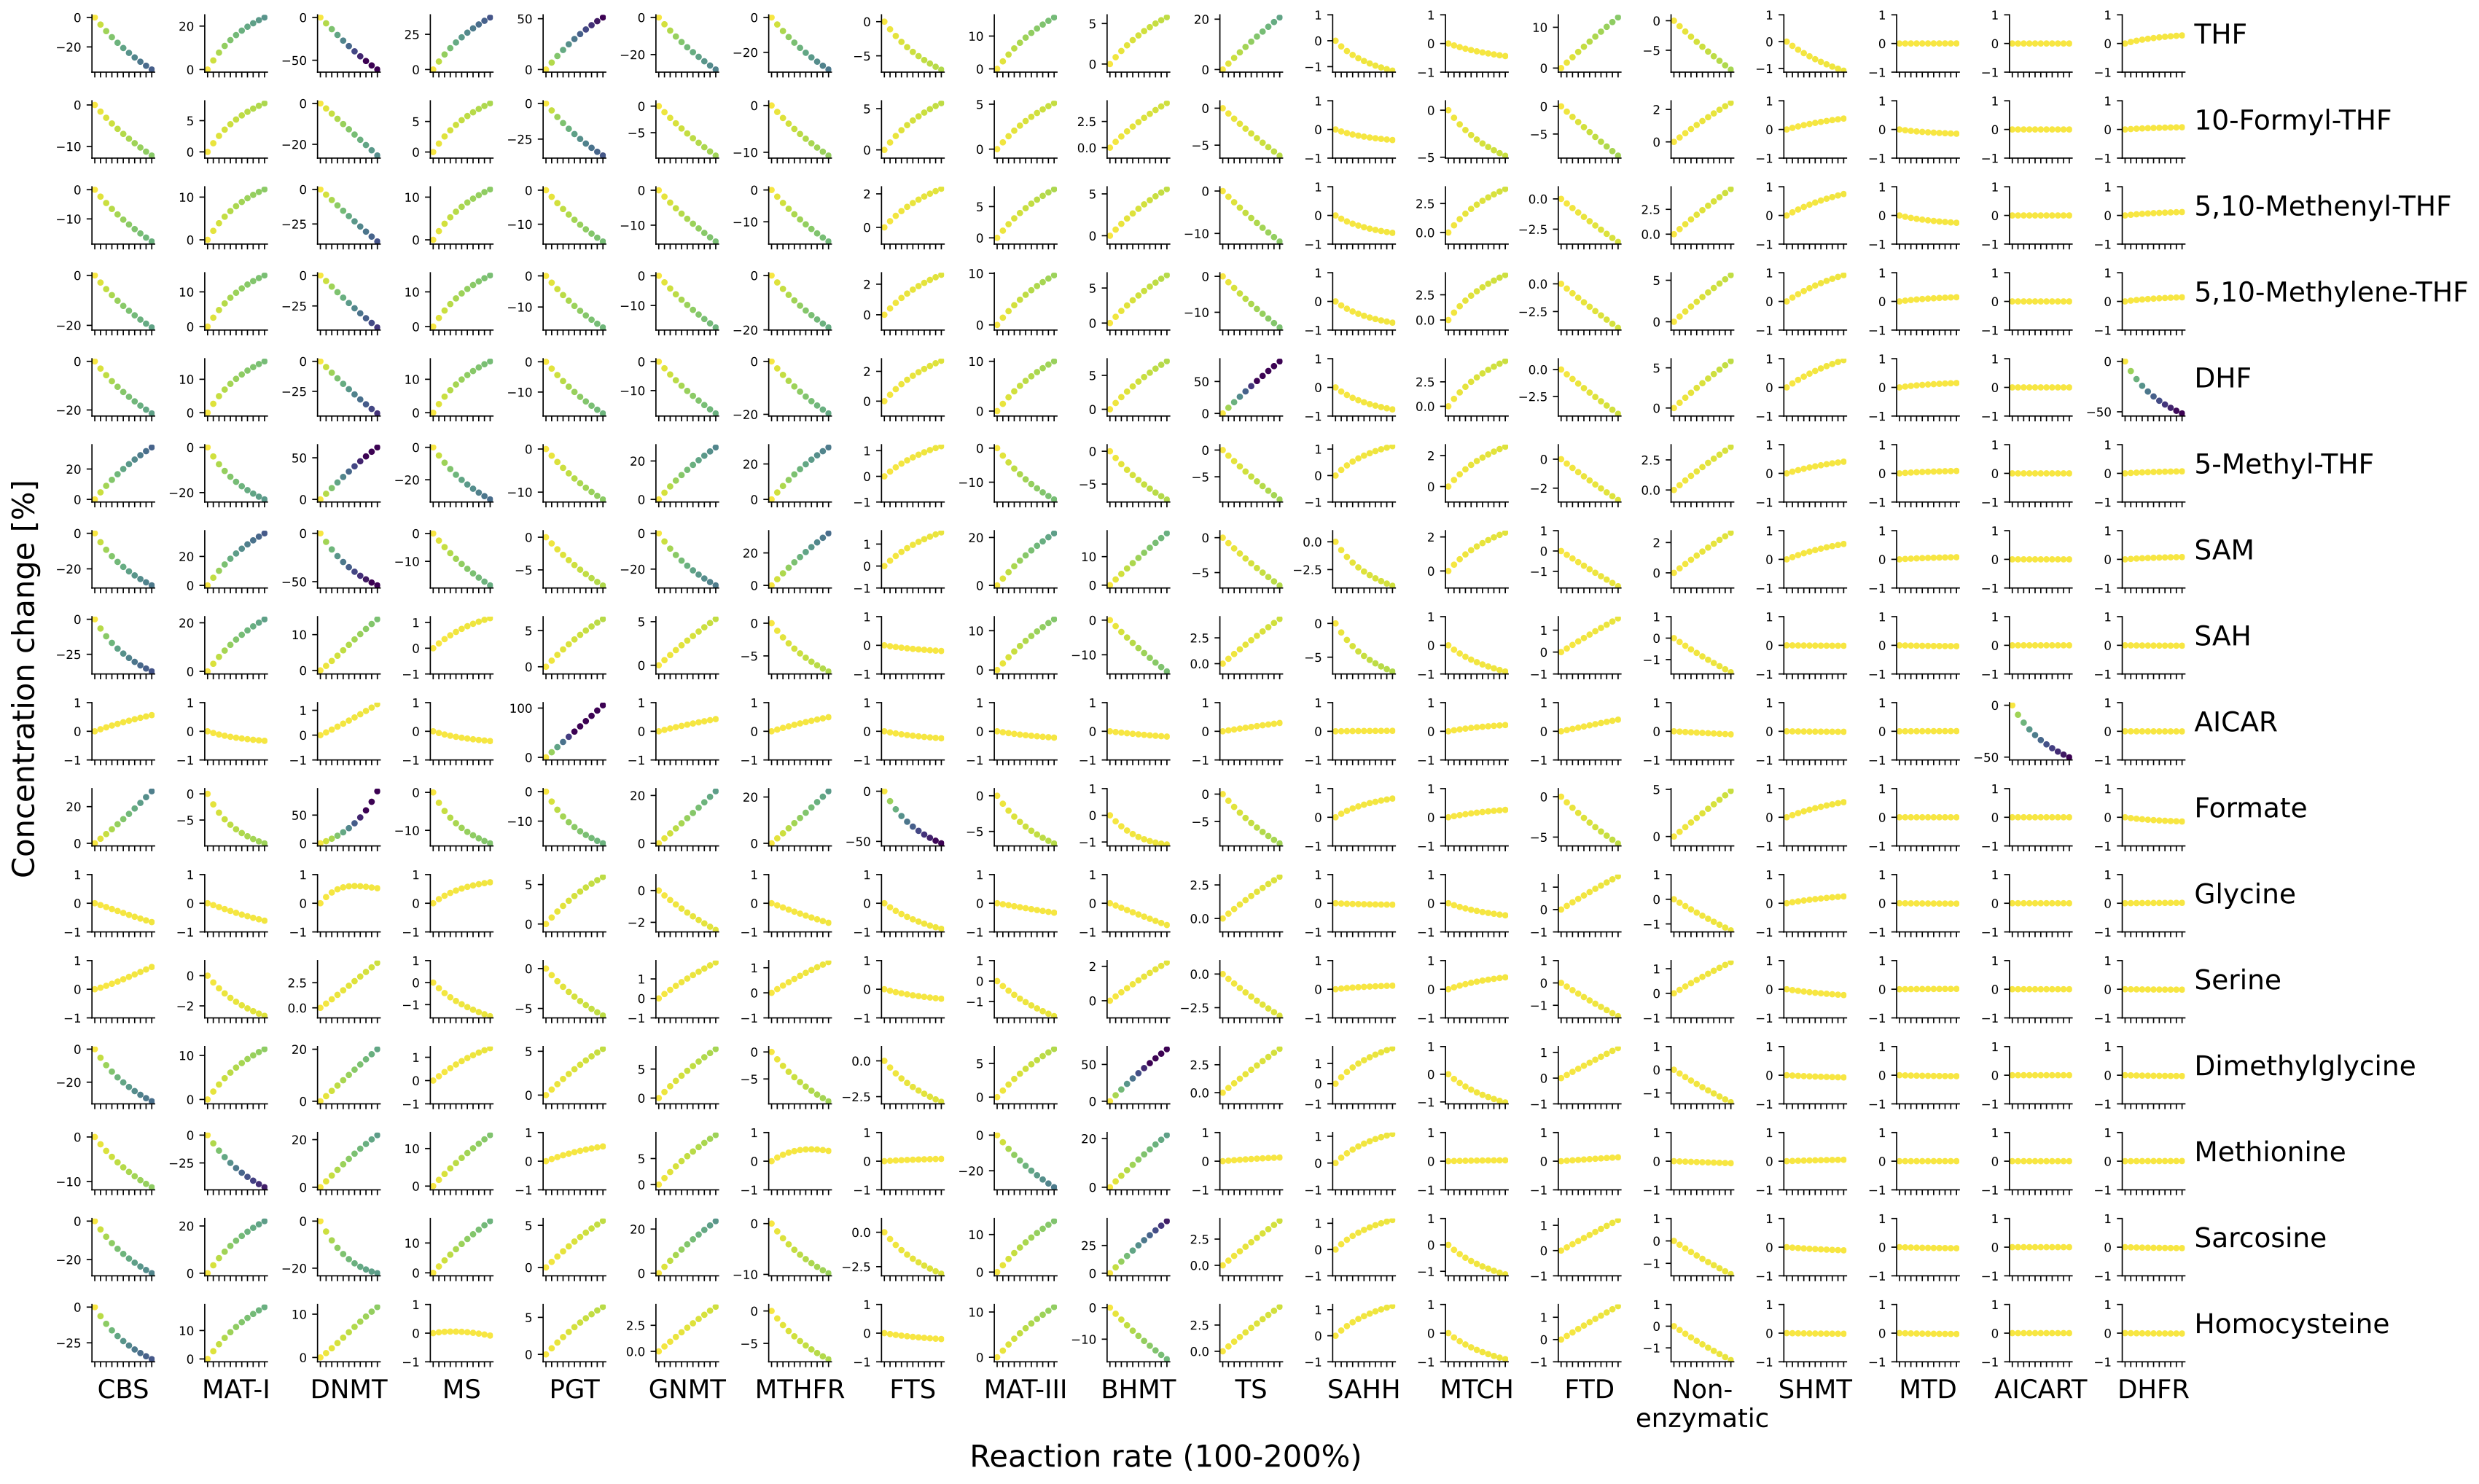
**Figure S1.** The interactions between all enzymes (represented by columns) and all metabolites (represented by rows) within the cytosol compartment of the model. Each panel depicts the changes in metabolite concentration resulting from alterations in the corresponding enzyme’s reaction rate, which was adjusted from 100% to 200% in increments of 10%. The intensity of the color in each point correlates with the magnitude of fluctuation, with a deeper blue denoting a larger change. The order of enzymes is the same as in Figure 2A.


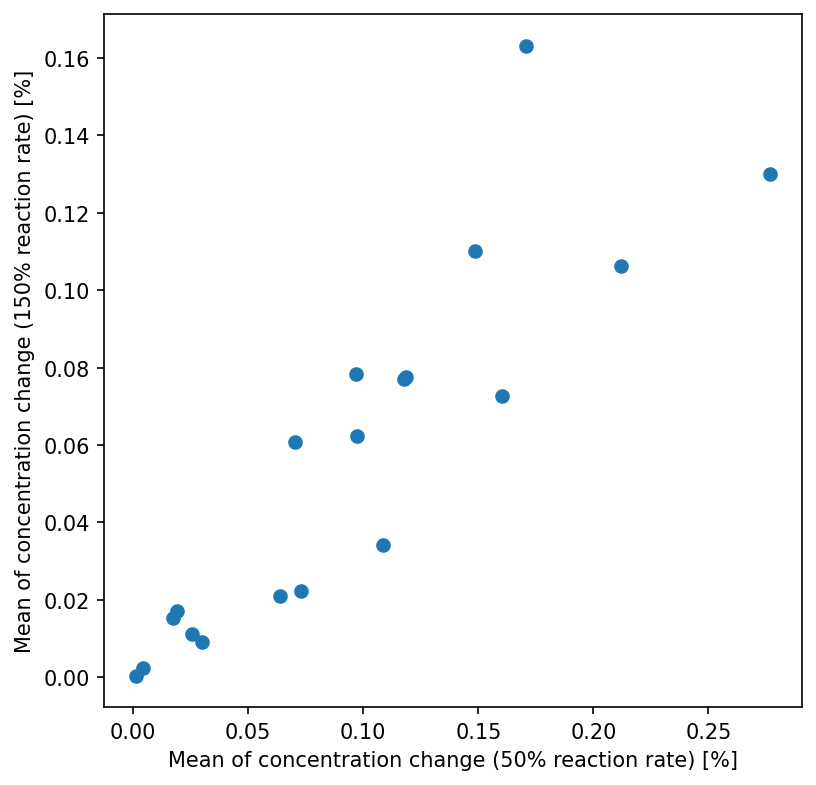


**Figure S2.** Scatter plot illustrating the trend in metabolite concentration changes in response to variations in enzyme reaction rates. Each point represents an enzyme, with the X-axis indicating the mean metabolite concentration change at a reaction rate of 50%, and the Y-axis indicating the mean metabolite concentration change at a reaction rate of 150%.

**ToMMo Study Group**

Hikaru Abe1, Michiaki Abe1, Momoka Abe1, Naomi Abe1, Noriko Abe1, Tomomi Abe1, Yuto Abe1, Shizuko Ahiko1, Kayo Aiki1, Hiromi Aizawa1, Yukari Akiyama1, Hayato Anzawa1, Eri Aoki1, Yuichi Aoki1, Hiroko Arai1, Misaki Arakawa1, Yukie Asano1, Liam Baird1, Ayano Chiba1, Haruna Chiba1, Ippei Chiba1, Kenji Chiba1, Tetsuo Chiba1, Hisako Endo1, Reika Fue1, Futaba Fujishiro1, Yayoi Fujita1, Waka Fukunaga1, Mami Funata1, Takamitsu Funayama1, Sho Furuhashi1, Nobuo Fuse1, Junko Fushimi1, Kumiko Fushiya1, Tomomi Gamo1, Chinatsu Gocho1, Katsuhiro Gonoi1, Maki Goto1, Takahiko Goto1, Yukie Goto1, Kaori Gouko1, Michiko Haga1, Yoko Haga1, Hiroko Hamada1, Yumiko Hamaie1, Yohei Hamanaka1, Mika Hanazawa1, Yukari Hara1, Atsushi Hasegawa1, Asuka Hatakeyama1, Sumika Hatakeyama1, Nozomi Hatanaka1, Rieko Hatanaka1, Takanori Hidaka1, Kenji Hino1, Hiroe Hirama1, Ikuo Hirano1, Sachiko Hirano1, Takumi Hirata1, Masahiro Hiratsuka1, Yuki Hiratsuka1, Ikuko Hirayama1, Eiji Hishinuma1,3, Takako Hoshi1, Atsushi Hozawa1, Keisuke Ido1, Nobuko Igari1, Chikako Iida1, Katsuko Imai1, Makiko Inoue1, Reiko Inoue1, Rumi Irie1, Motoko Ishida1, Noriko Ishida1, Eri Ishigaka1, Chihiro Ishii1, Kaori Ishii1, Osamu Ishii1, Tadashi Ishii1, Tatsuro Ishikawa1, Mami Ishikuro1, Kazutoshi Ishimori1, Miho Itabashi1, Kumiko Ito1, Maiko Ito1, Masumi Ito1, Mayumi Ito1, Megumi Ito1, Natsuko Ito1, Rie Ito1, Saori Ito1, Fumihiko Iwabuchi1, Maki Iwabuchi1, Yoko Izumi1, Yoshiko Izumi1, Masataka Kambe1, Takanari Kanno1, Mayu Kano1, Naoko Kasahara1, Hinako Kashiwa1, Kiyomi Katahira1, Mayumi Kato1, Yukie Kato1, Fumiki Katsuoka1, Takeshi Kawabata1, Rika Kawada1, Aoi Kawagoe1, Hiroshi Kawame1, Junko Kawashima1, Yukako Kawashima1, Junko Kikuchi1, Tsuyoshi Kikukawa1, Masahiro Kikuya1, Masae Kimura1, Michiko Kimura1, Kengo Kinoshita1,3,4, Ikuko Kishi1, Tomoko Kishimoto1, Tamie Kitaura1, Mika Kobayashi1, Tadao Kobayashi1, Tomoko Kobayashi1, Eiichi Kodama1, Shun Kodate1,2, Mana Kogure1, Toshisada Kohagizawa1, Naomi Kohketsu1, Noa Koida1, Chie Koide1, Mika Koide1, Toshihiko Koike1, Kaname Kojima1, Junko Komatsu1, Ayumi Kondo1, Riyo Konno1, Yukie Konno1, Sachie Koreeda1, Seizo Koshiba1,3, Takuya Koyama1, Hisaaki Kudo1, Kazuki Kumada1, Ryoko Kumadaki1, Rika Kumagai1, Toshie Kumagai1, Yuko Kumagai1, Yasuto Kunii1, Miho Kuriki1, Shinichi Kuriyama1, Emiko Kurokawa1, Seiko Kurota1, Hisako Kusano1, Bin Li1, Donghan Li1, Xue Li1, Kanako Maeshibu1, Keiko Maeta1, Satoshi Makino1, Hiroko Matsubara1, Naomi Matsukawa1, Masako Matsumoto1, Takako Matsuoka1, Yuka Matsushita1, Motomichi Matsuzaki1, Hirohito Metoki1, Sayaka Minakawa1, Yuki Minami1, Kyoko Mitate1, Satomi Mito1, Ayako Miura1, Noriko Miura1, Ryo Miyagi1, Akiko Miyazawa1, Satoshi Mizuno1, Akiko Mochida1, Mika Momii1, Hiroko Mori1, Naoko Mori1, Hozumi Motohashi1, Ikuko Motoike1,4, Shunji Mugikura1, Keiko Murakami1, Takahisa Murakami1, Masato Nagai1, Satoshi Nagaie1, Fuji Nagami1, Toko Naganuma1, Tatsuo Nagasaka1, Sachiko Nagase1, Kumiko Nakagawa1, Taku Nakai1, Noriko Nakajo1, Kyoko Nakamichi1, Chie Nakamura1, Naoki Nakamura1, Tomohiro Nakamura1, Yuko Nakasato1, Kumi Nakaya1, Naoki Nakaya1, Kei Nanatani1, Akira Narita1, Yuka Narita1, Yasuhisa Nemoto1, Hafumi Nishi1, Kohji Nishida1, Ichiko Nishijima1, Momo Nishiyama1, Takahiro Nobukuni1, Kotaro Nochioka1, Aoi Noda1, Kenichi Noguchi1, Kiriko Nozoe1, Rie Nunokawa1, Taku Obara1, Tomoko Obara1, Kaori Ogasawara1, Satoru Ogawa1, Soichi Ogishima1, Natsuki Oguma1, Nahoko Ohi1, Namiko Ohisa1, Kinuko Ohneda1, Hayami Ohori1, Miri Oikawa1, Yumi Oikawa1, Yumiko Ojima1, Yumi Okada1, Yasunobu Okamura1, Hiroshi Okuda1, Mitsuko Okuda1, Ayako Okumoto1, Akane Ono1, Chiaki Ono1, Genki Onodera1, Kaname Onodera1, Masako Onodera1, Midori Onuma1, Tomomi Onuma1, Keiichiro Oohashi1, Masumi Oomachi1, Kazuya Ootomo1, Yukie Oouchi1, Masatsugu Orui1, Mayumi Osada1, Tamae Osanai1, Reiko Ota1, Noriko Otake1, Sumie Otomo1, Akihito Otsuki1, Yoko Otsuki1, Yuki Oyama1, Keiko Oyamada1, Yoko Ozawa1, Satomi Obara1, Daisuke Saigusa1, Asami Saito1, Hisako Saito1, Kazue Saito1, Manami Saito1, Megumi Saito1, Ritsumi Saito1, Sakae Saito1, Tomo Saito1, Yoko Saito1, Yuki Saito1, Yoshinobu Saitoh1, Hiroko Sakai1, Masaki Sakaida1, Hiroshi Sakamono1, Hiromi Sakamoto1, Kana Sakamoto1, Mia Sakamoto1, Kasumi Sakurai1, Miyuki Sakurai1, Rieko Sakurai1, Mika Yageta1, Kana Sasaki1, Miho Sasaki1, Tadashi Sasaki1, Yukari Sasaki1, Yukie Sasaki1, Chika Sato1, Hirokazu Sato1, Michiyo Sato1, Miho Sato1, Mitsuharu Sato1, Miu Sato1, Naoko Sato1, Reiko Sato1, Satoshi Sato1, Shiho Sato1, Taku Sato1, Yoshiko Sato1, Youko Sato1, Yui Sato1, Michihiro Satoh1, Ayako Sekiya1, Mariko Seo1, Yoshiko Shima1, Muneaki Shimada1, Atsushi Shimizu1, Ritsuko Shimizu1, Genki Shinoda1, Nobuyuki Shirakawa1, Matsuyuki Shirota1, Hiroe Shoji1, Ikuko Shoji1, Mariko Shoji1, Midori Shoji1, Wakako Shoji1, Satomi Someya1, Shinya Sonobe1, Itsumi Sou1, Rie Suenaga1, Yasuko Suenaga1, Mayumi Suga1, Rika Sugai1, Junichi Sugawara1, Megumi Sugawara1, Michiko Sugawara1, Nanako Sugawara1, Saori Sugawara1, Yuki Sugawara1, Sachiyo Sugimoto1, Airi Suzuki1, Ayano Suzuki1, Keiko Suzuki1, Michirou Suzuki1, Mikiko Suzuki1, Norio Suzuki1, Rie Suzuki1, Ryoko Suzuki1, Takafumi Suzuki1, Tatsuya Suzuki1, Yoichi Suzuki1, Shu Tadaka1, Keiko Taguchi1, Nozomi Taiji1, Makiko Taira1, Kaori Takagi1, Emi Takahashi1, Harumi Takahashi1, Junko Takahashi1, Megumi Takahashi1, Noriko Takahashi1, Rieko Takahashi1, Yukiko Takahashi1, Mayuko Takasawa1, Masato Takase1, Jun Takayama1, Miho Takeuchi1, Sayaka Takita1, Toru Tamahara1, Gen Tamiya1, Naomi Tamura1, Akari Tanaka1, Saiko Tanaka1, Chihiro Tanno1, Naoko Tanno1, Keiko Tateno1, Minoru Tateno1, Chika Terui1, Mihoko Toki1, Sayuri Tokioka1, Etsuko Tomita1, Hiroaki Tomita1, Mai Tomizuka1, Naho Tsuchiya1, Miyuki Tsuda1, Tomomi Tsumuraya1, Junko Tsunasawa1, Issei Tsunoda1, Juri Uchiya1, Akiko Ueda1, Yuriko Ueki1, Fumihiko Ueno1, Keiko Umeda1, Akira Uruno1, Ikuko Wada1, Tomoko Wada1, Mika Wagatsuma1, Hitoshi Watanabe1, Kanako Watanabe1, Kazue Watanabe1, Nobuo Yaegashi1, Mika Yagyu1, Etsuko Yamada1, Yumi Kabata1, Hiroko Yamamoto1, Masayuki Yamamoto1,3, Yukari Yamauchi1, Mika Yamazaki1, Jun Yasuda1, Hang Yin1, Hiroshi Yokota1, Manami Yokoyama1, Marie Yokoyama1, Tomoko Yokoyama1, Yuko Yoshida1, Mizue Yoshino1, Zhiqian Yu1, and Lin Zhang1
