# Supplementary material for: Simulating Metabolic Pathways to Enhance Interpretations of Metabolome Genome-Wide Association Studies
Source: Research Square preprint supplement (doi:10.21203/rs.3.rs-5590960/v1), 2025-03-27
Supplement: Supplementary file 3 [file ee7e8be048872371c0aebd71.xlsx]

## Sheet:  supplementary table 2
Supplementary Table 2. The numbers of the functional variants in the exons of all genes analyzed in this study.
gene	Enzyme	length of total exon(bp)	nonsynonymous.SNV	synonymous.SNV
SHMT1	SHMT	2448	1	0
DHFR	DHFR	3925	2	0
ALDH1L1	FTD	3210	6	1
MTHFD1	FTS,MTCH,MTD	3182	2	0
MTHFR	MTHFR	7219	6	2
ATIC	AICART	1988	2	0
GART	PGT	3522	2	0
TYMS	TS	1619	1	2
MAT1A	MAT-I,MAT-III	3393	0	4
MAT2A	MAT-I,MAT-III	2826	0	2
MAT2B	MAT-I,MAT-III	2071	0	1
GNMT	GNMT	1082	0	0
DNMT1	DNMT	5266	3	4
AHCY	SAAH	2160	0	0
MTR	MS	10466	1	5
BHMT	BHMT	2478	1	1
CBS	CBS	2609	0	0
